# Supplementary material for: Reconstruction of Family-Level Phylogenetic Relationships within Demospongiae (Porifera) Using Nuclear Encoded Housekeeping Genes
Source: PLOS journal article supplement (doi:10.1371/journal.pone.0050437), 2013-01-23

Figure S1. Maximum Likelihood Mapping shows ALD has signal to resolve unambiguously over 90% of the quartets that make up the ALD-derived tree. ALD cannot resolve 4.4% of the quartets.

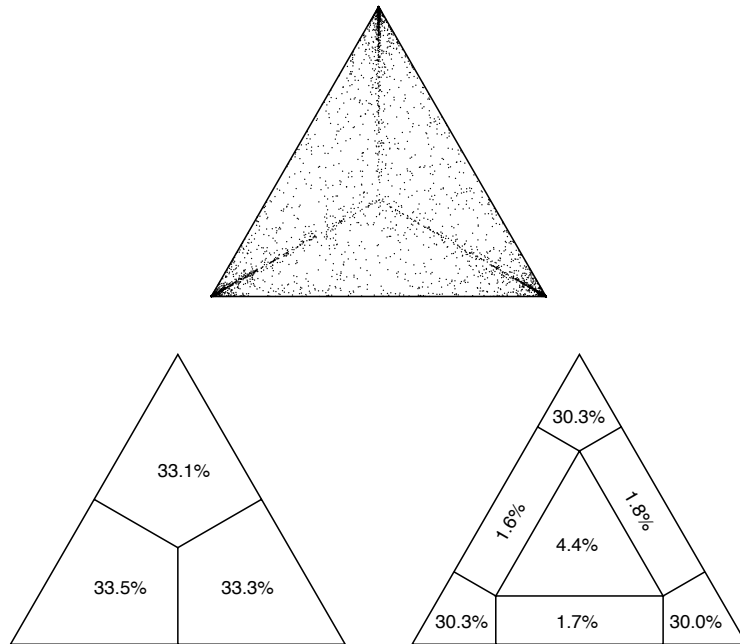

Supplement: S1 (10.1371/journal.pone.0050437.s001) [file journal.pone.0050437.s001]
