# Supplementary material for: Reconstruction of Family-Level Phylogenetic Relationships within Demospongiae (Porifera) Using Nuclear Encoded Housekeeping Genes
Source: PLOS journal article supplement (doi:10.1371/journal.pone.0050437), 2013-01-23

Figure S3. Maximum Likelihood Mapping shows CAT has signal to resolve unambiguously over 82% of the quartets that make up the CAT-derived tree. CAT cannot resolve 9% of the quartets.

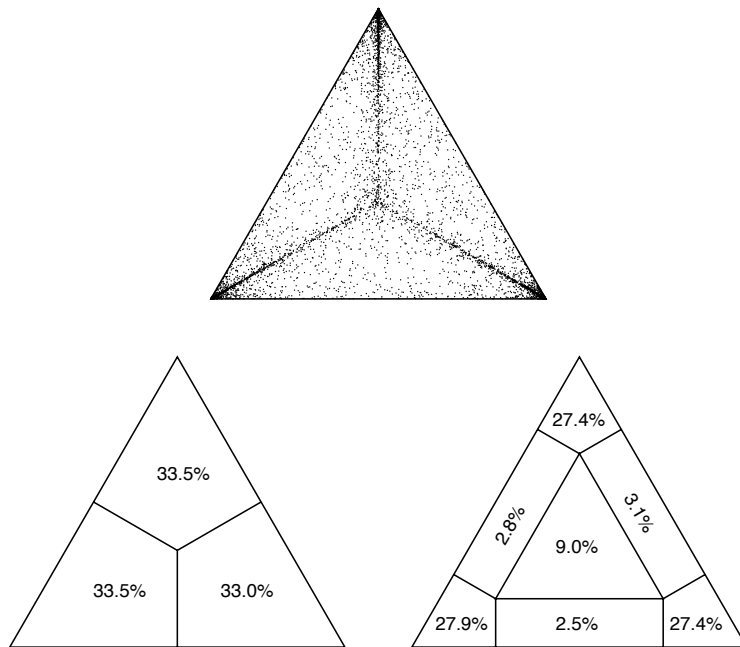

Supplement: S3 (10.1371/journal.pone.0050437.s003) [file journal.pone.0050437.s003]
