# Supplementary material for: Reconstruction of Family-Level Phylogenetic Relationships within Demospongiae (Porifera) Using Nuclear Encoded Housekeeping Genes
Source: PLOS journal article supplement (doi:10.1371/journal.pone.0050437), 2013-01-23

Figure S6. Maximum Likelihood Mapping shows PFK has signal to resolve unambiguously over 71% of the quartets that make up the PFKtree. PFK cannot resolve 20.6% of the quartets.

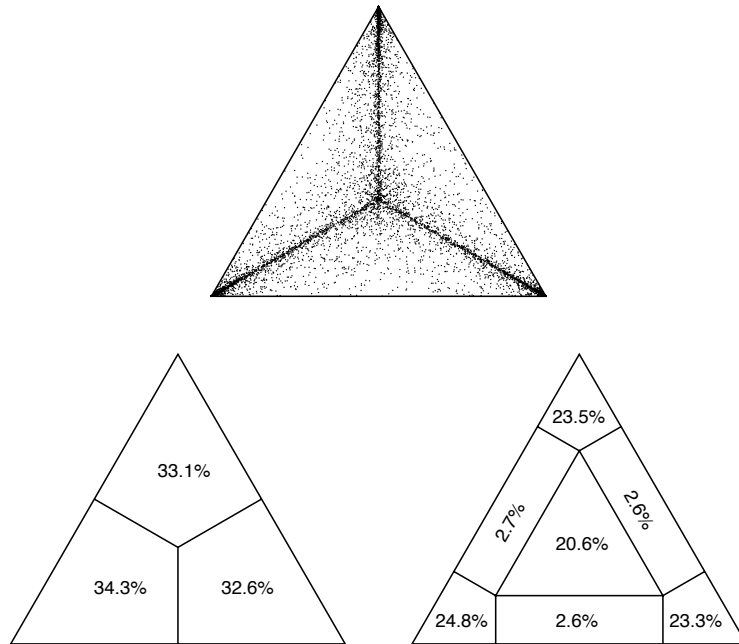

Supplement: S6 (10.1371/journal.pone.0050437.s006) [file journal.pone.0050437.s006]
