# Supplementary material for: Reconstruction of Family-Level Phylogenetic Relationships within Demospongiae (Porifera) Using Nuclear Encoded Housekeeping Genes
Source: PLOS journal article supplement (doi:10.1371/journal.pone.0050437), 2013-01-23

Figure S7. Maximum Likelihood Mapping shows TPI has signal to resolve unambiguously over 76% of the quartets that make up the TPI-derived tree. TPI cannot resolve 15.8% of the quartets.

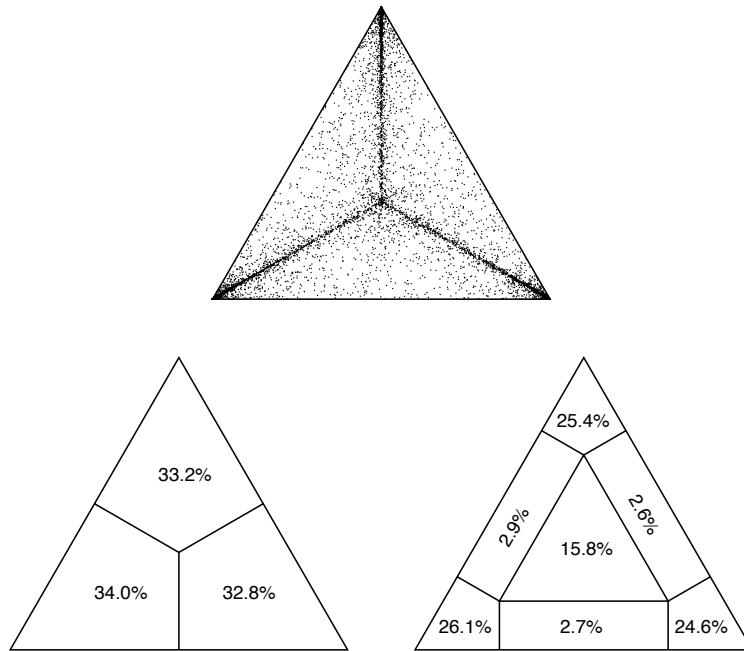

Supplement: S7 (10.1371/journal.pone.0050437.s007) [file journal.pone.0050437.s007]
