# Supplementary material for: Reconstruction of Family-Level Phylogenetic Relationships within Demospongiae (Porifera) Using Nuclear Encoded Housekeeping Genes
Source: PLOS journal article supplement (doi:10.1371/journal.pone.0050437), 2013-01-23

Figure S20. Bayesian analysis of Dayhoff recoded data using GTR.

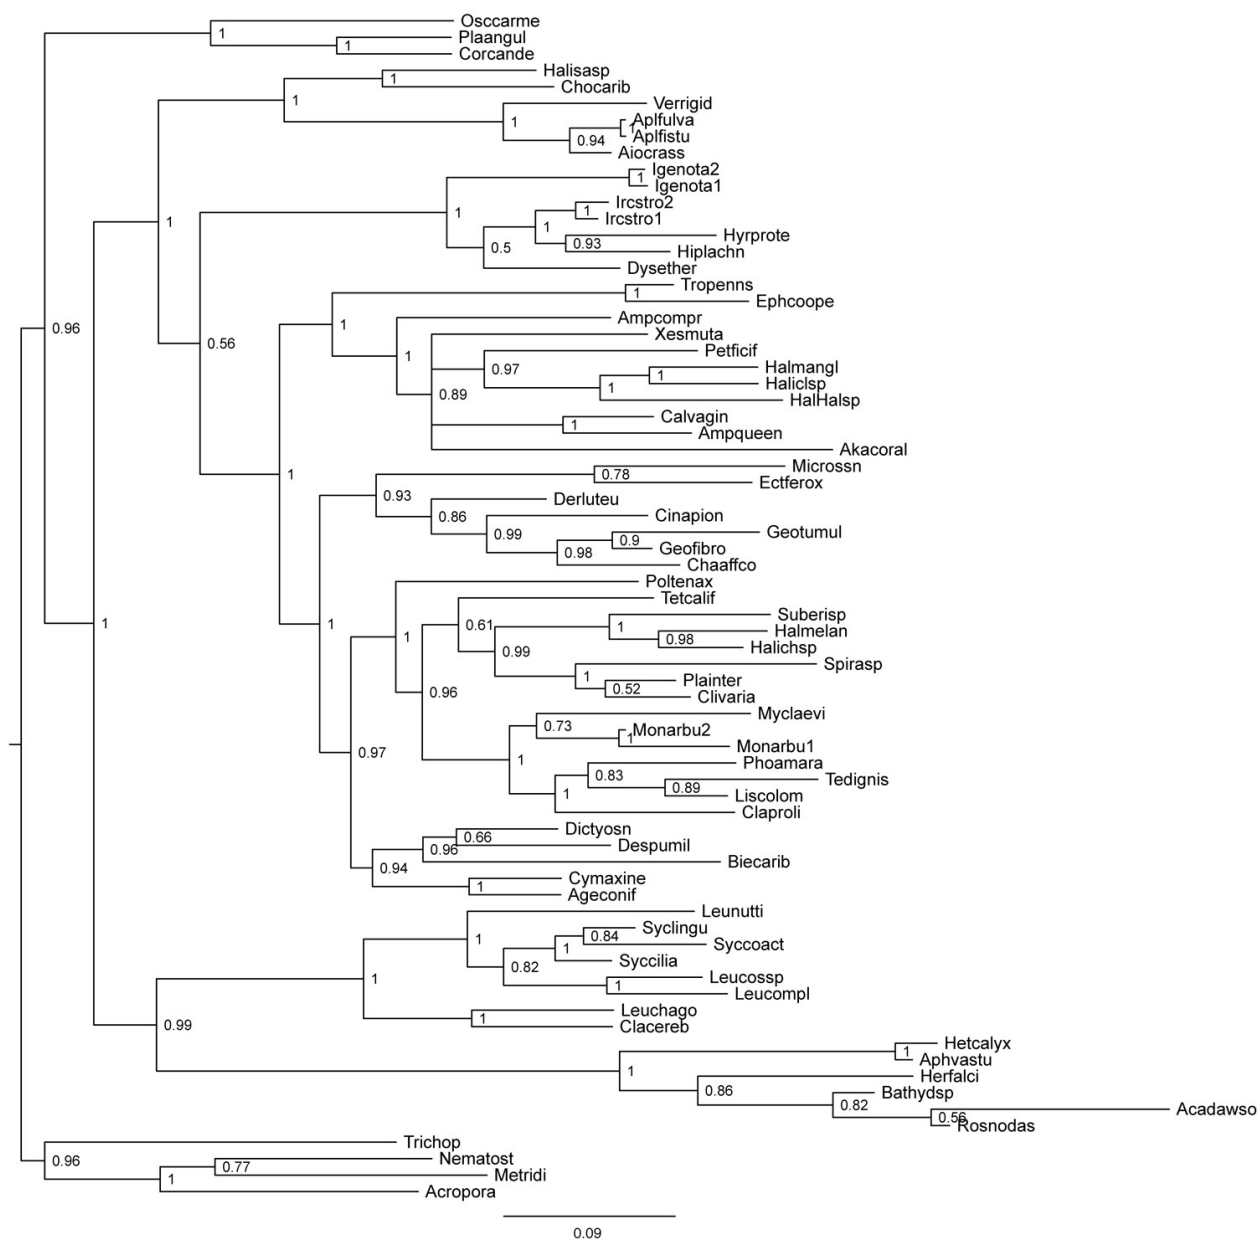

Supplement: S20 (10.1371/journal.pone.0050437.s020) [file journal.pone.0050437.s020]
